# Supplementary material
Source: publisher figshare collection journal article supplement (https://asha.figshare.com/articles/dataset/_/26485627)
Supplement: Supplementary file 1 [file 1]

**Supplemental Material S2.** Correlations between microlinguistic and macrolinguistic narrative variables for persons with aphasia and neurologically healthy controls.

| Microlinguistic variables | Macrolinguistic variables |                |                |                |              |                   |
|---------------------------|---------------------------|----------------|----------------|----------------|--------------|-------------------|
|                           | LC errors                 | GC errors      | MC             | Org            | Language use | Total macro score |
| <b>Aphasia Group</b>      |                           |                |                |                |              |                   |
| Speech Rate               | .002                      | .023           | <b>.491*</b>   | <b>.513*</b>   | .202         | <b>.531*</b>      |
| MLU (words)               | -.275                     | <b>-.435*</b>  | <b>.648**</b>  | <b>.719**</b>  | .342         | <b>.650**</b>     |
| % Nouns                   | <b>-.586*</b>             | -.077          | .360           | .343           | -.231        | .261              |
| % Verbs                   | -.017                     | .196           | -.165          | -.048          | -.068        | -.079             |
| % Open-class words        | <b>-.531**</b>            | -.127          | -.316          | .325           | -.226        | .240              |
| % Closed-class words      | <b>-.621**</b>            | -.059          | -.176          | -.176          | .238         | -.122             |
| MATTR                     | <b>-.493*</b>             | <b>-.534**</b> | .088           | .274           | .186         | .186              |
| Verbs per utterance       | -.163                     | -.288          | <b>.675**</b>  | <b>.638**</b>  | <b>.443*</b> | <b>.685**</b>     |
| % Word errors             | .074                      | <b>.559**</b>  | <b>-.529**</b> | <b>-.560**</b> | -.352        | <b>-.557**</b>    |
| <b>Control Group</b>      |                           |                |                |                |              |                   |
| Speech Rate               | .193                      | .068           | .026           | -.115          | .115         | .045              |
| MLU (words)               | .116                      | .230           | -.051          | -.141          | .067         | .159              |
| % Nouns                   | -.389                     | -.155          | -.016          | .205           | -.217        | -.264             |
| % Verbs                   | -.133                     | -.004          | .178           | .086           | -.217        | -.264             |
| % Open-class words        | -.249                     | .165           | .239           | .395           | .275         | .322              |
| % Closed-class words      | .198                      | -.153          | -.228          | -.459          | -.267        | -.297             |
| MATTR                     | <b>.580*</b>              | .427           | -.221          | -.019          | .060         | .051              |
| Verbs per utterance       | -.038                     | .220           | -.046          | -.048          | -.038        | .113              |
| % Word errors             | .330                      | .472           | -.102          | .261           | .289         | .060              |

Note.  $r_s$  = Spearman correlation coefficient;  $p$  = Probability values refer to Spearman's correlation results, while correcting for multiple comparisons using False Discovery Rate; \* $p < .05$ ; \*\* $p < .01$ ; values in bold font = Correlation was significantly significant ( $p < 0.05$ ); MLU = Mean length of utterance; MATTR = Moving Average Type-Token Ratio; LC = Local Coherence; GC = Global Coherence; MC = Main Concepts; Org = Organization; Macro = Macrolinguistic
