# Supplementary material
Source: publisher figshare collection journal article supplement (https://asha.figshare.com/articles/dataset/_/26485627)
Supplement: Supplementary file 3 [file 1]

**Supplemental Material S4.** Spearman correlations between macrolinguistic narrative and executive functioning variables in persons with aphasia and neurologically healthy controls.

| EF Variables         | Macrolinguistic variables |                           |               |               |              |                             |
|----------------------|---------------------------|---------------------------|---------------|---------------|--------------|-----------------------------|
|                      | % Local coherence errors  | % Global coherence errors | Main concepts | Organization  | Language Use | Total macrolinguistic score |
| <b>Aphasia Group</b> |                           |                           |               |               |              |                             |
| TVCF-CF              | <b>-.514*</b>             | -.132                     | <b>.815**</b> | <b>.856**</b> | .210         | <b>.825**</b>               |
| TVCF-LN              | <b>-.524*</b>             | -.129                     | <b>.799**</b> | <b>.854**</b> | .220         | <b>.815**</b>               |
| NIHTB-LS             | -.271                     | -.297                     | .288          | .314          | .041         | .311                        |
| TEA-VE               | <b>-.229*</b>             | -.121                     | <b>.558*</b>  | <b>.493*</b>  | .163         | <b>.538*</b>                |
| CTONI-PA             | -.200                     | -.351                     | .186          | .395          | .144         | .219                        |
| NIHTB-FL             | .065                      | .316                      | -.155         | -.220         | -.259        | -.194                       |
| NIHTB-FL RT          | .222                      | .169                      | <b>-.441*</b> | <b>-.434*</b> | -.172        | <b>-.430*</b>               |
| TVCF-Trails C        | .361                      | -.094                     | -.410         | -.476         | .071         | -.397                       |
| NIHTB-DCCS           | -.320                     | .176                      | .358          | .213          | -.172        | .239                        |
| NIHTB-DCCS RT        | .394                      | -.045                     | <b>-.542*</b> | <b>-.537*</b> | .130         | <b>-.448*</b>               |
| CTONI-GC             | -.470                     | -.029                     | .236          | .367          | .174         | .339                        |
| RFFT                 | -.302                     | -.051                     | .358          | .129          | -.108        | .325                        |
| <b>Control Group</b> |                           |                           |               |               |              |                             |
| TVCF-CF              | .000                      | -.242                     | .064          | .030          | -.145        | -.007                       |
| TVCF-LN              | .179                      | .069                      | -.211         | -.207         | -.251        | -.173                       |
| NIHTB-LS             | -.183                     | .100                      | <b>.422*</b>  | .461          | .325         | <b>.473*</b>                |
| TEA-ECD              | -.338                     | -.261                     | <b>.571*</b>  | .362          | .103         | .286                        |
| TEA-VE               | -.248                     | -.383                     | <b>.492*</b>  | .426          | .396         | <b>.407*</b>                |
| CTONI-PA             | -.390                     | .067                      | <b>.500*</b>  | .251          | <b>.502*</b> | <b>.638**</b>               |
| NIHTB-FL             | -.138                     | -.276                     | .295          | .066          | .196         | .212                        |
| NIHTB-FL RT          | .157                      | -.119                     | -.486         | -.224         | -.197        | -.394                       |
| TVCF-Trails C        | -.003                     | -.182                     | -.052         | .025          | -.192        | -.179                       |
| NIHTB-DCCS           | -.267                     | .018                      | .309          | .179          | .172         | .177                        |
| NIHTB-DCCS RT        | .409                      | -.023                     | -.274         | -.178         | -.063        | -.117                       |
| CTONI-GC             | .039                      | .270                      | .315          | .122          | .291         | .390                        |
| RFFT                 | -.236                     | -.119                     | -.086         | -.165         | .180         | .152                        |

Note.  $r_s$  = Spearman correlation coefficient;  $p$  = Probability values refer to Spearman's correlation results, while correcting for multiple comparisons using False Discovery Rate; \* $p < .05$ ; \*\* $p < .01$ ; values in bold font = Correlation was significantly significant ( $p < 0.05$ ); EF = Executive functioning; TVCF = Test of Verbal Conceptualization and Fluency; CF = Categorical Fluency; LN = Letter Naming; NIHTB = National Institute of Health Toolbox; LS = List sorting; FL = Flanker; DCCS = Dimensional Card Sorting; RT = Reaction time; TEA-VE = Test of Everyday Attention (visual elevator subtest); CTONI = Comprehensive Test of Nonverbal Intelligence; PA = Pictorial Analogies; GC = Geometric Categories; RFFT = Ruff Figural Fluency Test (total designs produced).
