# Supplementary material
Source: publisher figshare collection journal article supplement (https://asha.figshare.com/articles/dataset/_/26485627)
Supplement: Supplementary file 4 [file 1]

**Supplemental Material S3.** Spearman correlations between microlinguistic narrative and executive functioning variables in persons with aphasia and neurologically healthy controls.

| EF variables         | Microlinguistic variables |       |                |            |        |         |             |                      |
|----------------------|---------------------------|-------|----------------|------------|--------|---------|-------------|----------------------|
|                      | Speech Rate               | MLU   | Verbs per utt. | Total CIUs | %CIU   | CIU/min | Word errors | % Gram complete utt. |
| <b>Aphasia Group</b> |                           |       |                |            |        |         |             |                      |
| TVCF-CF              | .520*                     | .532* | .514*          | .675**     | .702** | .673**  | -.415       | .258                 |
| TVCF-LN              | .511*                     | .511* | .505*          | .672**     | .667** | .654**  | -.435       | .277                 |
| NIHTB-LS             | .148                      | .357  | .289           | .409*      | .510*  | .428*   | -.162       | -.031                |
| TEA-VE               | .348                      | .284  | .322           | .453*      | .550*  | .449*   | -.449*      | .040                 |
| CTONI-PA             | -.023                     | .500* | .271           | .090       | .084   | .118    | -.337       | .185                 |
| NIHTB-FL             | .182                      | -.383 | -.204          | -.158      | -.145  | -.457   | .200        | -.537*               |
| NIHTB-FL RT          | -.152                     | -.263 | -.204          | -.361      | -.448  | -.457   | .289        | -.177                |
| TVCF-Trails C        | -.300                     | -.175 | -.137          | -.440      | -.482* | -.523*  | .238        | -.064                |
| NIHTB-DCCS           | .089                      | .196  | .218           | .305       | .232   | .177    | -.038       | -.216                |
| NIHTB-DCCS RT        | -.407                     | .422  | -.400          | -.355      | -.503* | -.548*  | .272        | -.177                |
| CTONI-GC             | .235                      | .125  | .061           | .168       | .528*  | .410*   | -.010       | -.205                |
| RFFT                 | .389                      | .250  | .020           | .364       | .552*  | .663**  | -.282       | .431                 |
| <b>Control Group</b> |                           |       |                |            |        |         |             |                      |
| TVCF-CF              | -.266                     | .064  | .084           | -.582*     | .025   | -.020   | -.268       | .023                 |
| TVCF-LN              | -.266                     | -.036 | -.002          | -.368      | .110   | .019    | -.002       | .013                 |
| NIHTB-LS             | .072                      | -.257 | .131           | .404       | .158   | .171    | .275        | .441                 |
| TEA-VE               | .061                      | .127  | .219           | .390       | .085   | .111    | .092        | -.393                |
| CTONI-PA             | .114                      | .127  | .219           | .374       | .047   | .029    | .098        | -.044                |
| NIHTB-FL             | .193                      | -.321 | -.265          | .064       | .257   | .289    | .139        | -.265                |
| NIHTB-FL RT          | -.188                     | .005  | .194           | -.245      | .257   | .289    | .139        | .267                 |
| TVCF-Trails C        | -.375                     | .071  | .057           | -.461      | -.188  | -.387   | -.228       | .057                 |
| NIHTB-DCCS           | -.432                     | -.461 | .279           | .308       | .430   | .209    | .472        | .418                 |
| NIHTB-DCCS RT        | -.432                     | .284  | .279           | -.139      | -.044  | -.446   | .028        | .279                 |
| CTONI-GC             | .192                      | -.105 | -.227          | .210       | -.070  | -.026   | .078        | -.227                |
| RFFT                 | .141                      | .025  | .266           | .114       | .081   | .216    | -.052       | .266                 |
